# Supplementary material for: Pharmacokinetics, Pharmacodynamics, and Safety of Canagliflozin in Japanese Patients with Type 2 Diabetes Mellitus
Source: PubMed Central journal article supplement — Adv Ther. 2015 Aug 18;32(8):768–82. doi: 10.1007/s12325-015-0234-0 (PMC4569680; doi:10.1007/s12325-015-0234-0), 2015-08-18
Supplement: 12325_2015_234_MOESM2_ESM.pdf [file 12325_2015_234_MOESM2_ESM.pdf]

- This study was conducted to evaluate the pharmacokinetics, pharmacodynamics and safety of canagliflozin in Japanese patients with type 2 diabetes mellitus (T2DM).
- Canagliflozin, at doses of 25, 100, 200, or 400 mg, was administered as a single dose and multiple doses to 61 Japanese patients with T2DM in a randomized, double-blind, placebo-controlled study.
- Plasma canagliflozin maximum concentration and area under the concentration-time curve increased in a dose-dependent manner and no significant changes in time to maximum concentration and elimination half-life were observed after multiple-dose administration.
- Canagliflozin increased urinary glucose excretion, decreased the renal threshold for glucose excretion, and decreased fasting plasma glucose/24-h mean plasma glucose throughout the multiple-dose administration period.
- No significant adverse events were noted and dehydration-related parameters remained unchanged.

This summary slide represents the opinions of the authors. Sponsorship for this study was funded by Mitsubishi Tanabe Pharma Corp. Medical writing assistance for this study was provided by Dr A. Saito. For a full list of acknowledgments and conflicts of interest for all authors of this article, please see the full text online. Copyright © The Authors 2015. Creative Commons Attribution Noncommercial License (CC BY-NC).
