# Supplementary material for: Pharmacokinetics, Pharmacodynamics, and Safety of Canagliflozin in Japanese Patients with Type 2 Diabetes Mellitus
Source: Springer Nature journal article supplement (doi:10.1007/s12325-015-0234-0), 2015-08-01
Supplement: MOESM1 [file 9203554]

## ELECTRONIC SUPPLEMENTARY MATERIAL

**Fig. S1** Urinary volume (a) and water intake (b) during canagliflozin treatment. Data are mean  $\pm$  standard deviation.

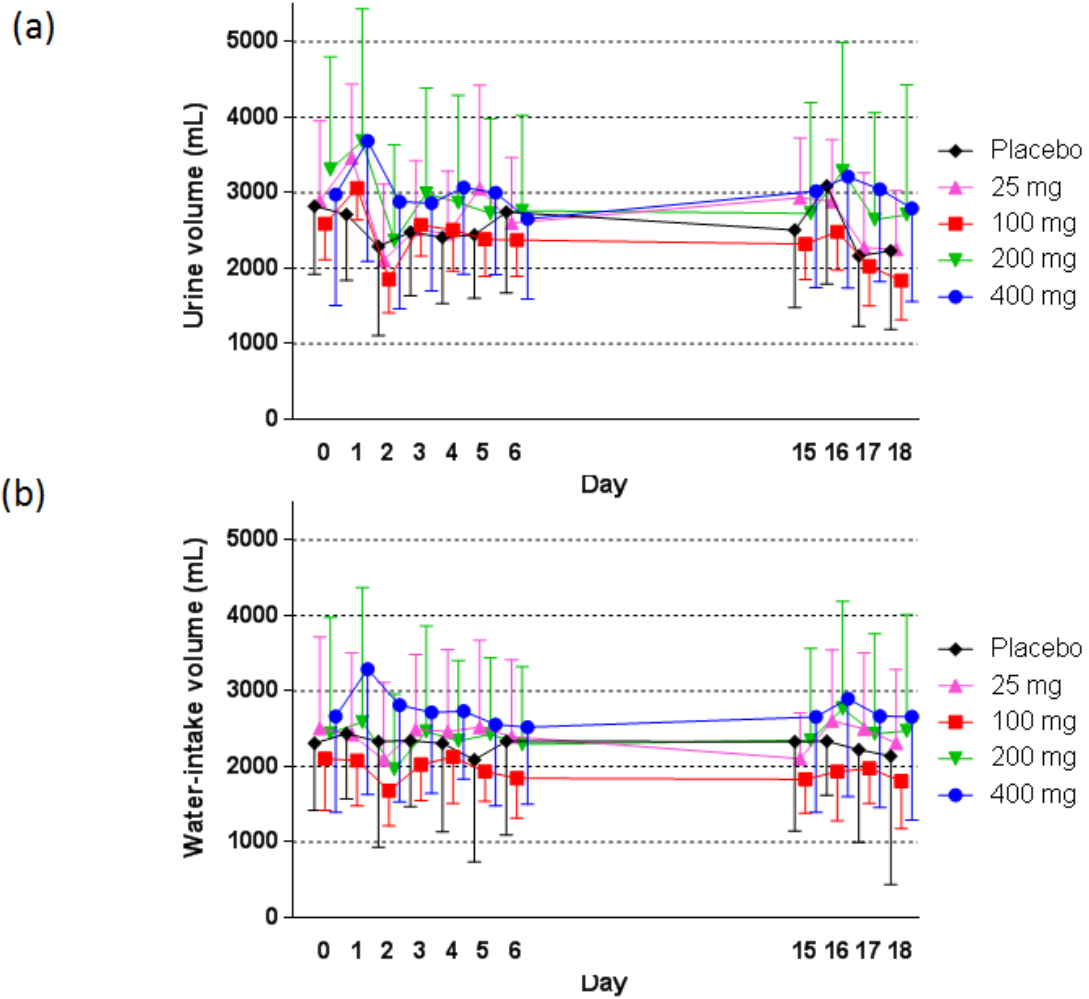

**Fig. S2** Systolic (a) and diastolic (b) blood pressure–time profiles on Days 0, 1, and 16 after canagliflozin administration. Data are mean  $\pm$  standard deviation. *SBP* systolic blood pressure, *DBP* diastolic blood pressure

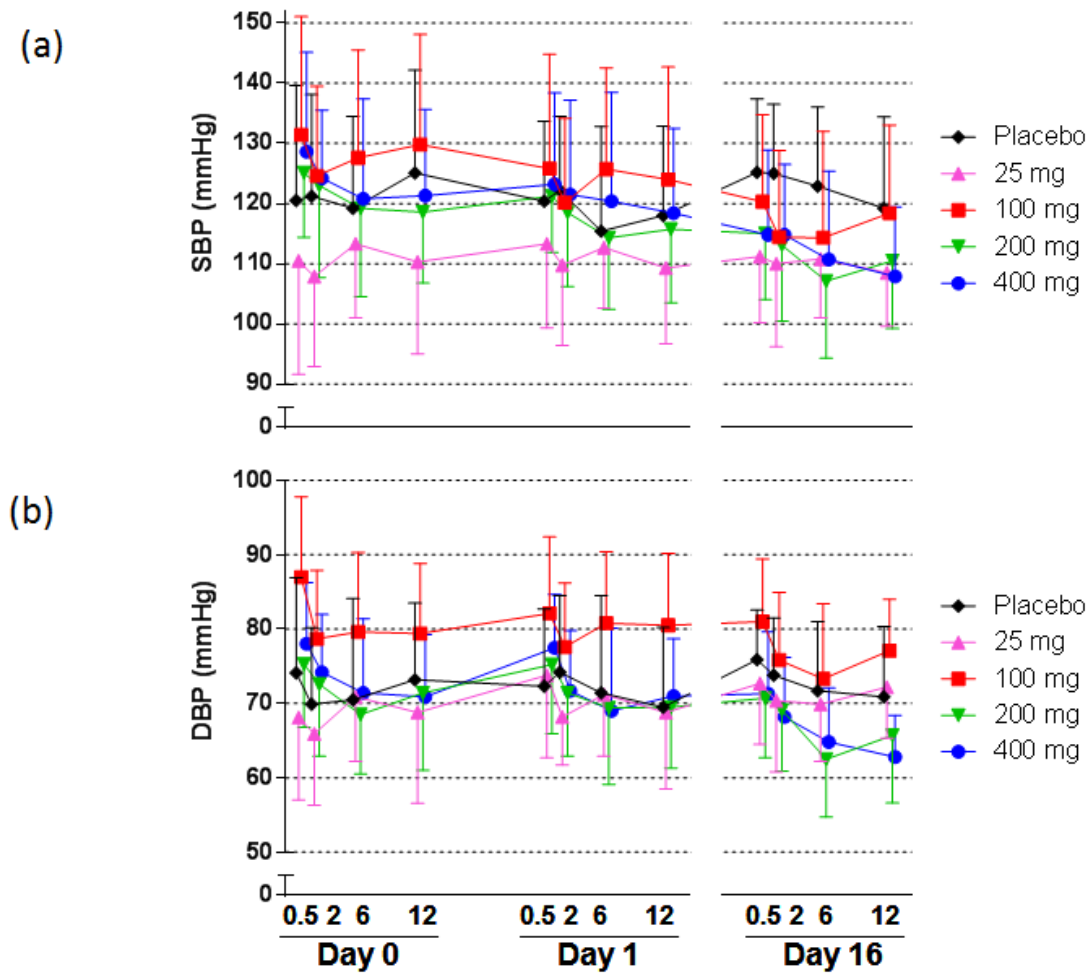

**Table S1** Changes in fasting plasma glucose and serum insulin

| Mean (SD)           | Placebo |        | Canagliflozin |        |        |       |        |       |        |        |
|---------------------|---------|--------|---------------|--------|--------|-------|--------|-------|--------|--------|
|                     |         |        | 25 mg         |        | 100 mg |       | 200 mg |       | 400 mg |        |
| FPG, mg/dL          |         |        |               |        |        |       |        |       |        |        |
| Day 1               | 183     | (39)   | 165           | (19)   | 156    | (20)  | 163    | (15)  | 168    | (28)   |
| ΔDay 2              | -2      | (7)    | -8            | (6)    | -19    | (12)  | -32    | (11)  | -41    | (17)   |
| ΔDay 17             | -6      | (26)   | -25           | (16)   | -29    | (22)  | -51    | (16)  | -60    | (25)   |
| 24-h mean PG, mg/dL |         |        |               |        |        |       |        |       |        |        |
| Day 0               | 233     | (45)   | 213           | (19)   | 200    | (27)  | 209    | (31)  | 217    | (34)   |
| ΔDay 1              | -3      | (16)   | -25           | (10)   | -19    | (17)  | -30    | (15)  | -43    | (15)   |
| ΔDay 16             | -11     | (33)   | -42           | (16)   | -29    | (28)  | -57    | (24)  | -75    | (29)   |
| SI, fasting, μU/mL  |         |        |               |        |        |       |        |       |        |        |
| Day 1               | 5.2     | (2.6)  | 5.2           | (2.1)  | 4.9    | (2.3) | 4.3    | (2.0) | 6.3    | (3.9)  |
| ΔDay 2              | 1.1     | (1.4)  | 0.6           | (1.2)  | -1.0   | (1.0) | -1.5   | (1.4) | -2.2   | (1.7)  |
| ΔDay 17             | 0.7     | (1.4)  | 0.8           | (1.9)  | -1.1   | (1.3) | -0.9   | (1.5) | -1.7   | (1.6)  |
| 24-h mean SI, μU/mL |         |        |               |        |        |       |        |       |        |        |
| Day 0               | 18.9    | (10.6) | 20.9          | (16.9) | 19.8   | (9.6) | 10.2   | (3.5) | 18.7   | (12.9) |
| ΔDay 1              | -0.3    | (2.5)  | -3.4          | (6.9)  | -2.2   | (4.8) | -1.5   | (1.8) | -4.1   | (3.3)  |
| ΔDay 16             | -1.0    | (2.0)  | -4.0          | (7.4)  | -2.9   | (3.1) | -0.7   | (2.7) | -2.9   | (4.4)  |

*SD* standard deviation, *FPG* fasting plasma glucose, *SI* serum insulin

FPG: 1 mg/dL = 0.0555 mmol/L; insulin: 1 μU/mL = 6.945 pmol/L

**Table S2** Urinary electrolyte excretion in 24 hours

| Mean (SD) | Day              | Placebo           | Canagliflozin     |                  |                  |                  |                   |
|-----------|------------------|-------------------|-------------------|------------------|------------------|------------------|-------------------|
|           |                  |                   | 25 mg             | 100 mg           | 200 mg           | 400 mg           |                   |
| Sodium    | mEq              | Baseline          | 191.57 ( 41.70 )  | 225.61 ( 38.76 ) | 216.47 ( 35.49 ) | 130.79 ( 51.40 ) | 140.81 ( 57.08 )  |
|           | ΔmEq             | 1                 | -21.25 ( 36.64 )  | 29.73 ( 43.45 )  | 54.12 ( 41.80 )  | 44.32 ( 49.89 )  | 36.15 ( 33.35 )   |
|           |                  | 2                 | -37.22 ( 28.59 )  | -40.70 ( 31.19 ) | -18.88 ( 56.44 ) | -14.44 ( 34.33 ) | -18.04 ( 33.56 )  |
|           |                  | 3                 | -31.28 ( 28.34 )  | -4.79 ( 51.89 )  | 29.54 ( 29.74 )  | 15.58 ( 38.07 )  | 16.22 ( 46.73 )   |
|           |                  | 4                 | -8.11 ( 33.99 )   | 14.28 ( 57.11 )  | 61.76 ( 41.72 )  | -0.29 ( 25.68 )  | 1.85 ( 28.50 )    |
|           |                  | 5                 | 5.68 ( 45.21 )    | 21.56 ( 58.85 )  | 30.62 ( 46.97 )  | -1.23 ( 30.57 )  | 2.65 ( 32.77 )    |
|           |                  | 6                 | -28.59 ( 49.12 )  | -25.58 ( 47.38 ) | -19.19 ( 28.08 ) | 3.64 ( 28.48 )   | -12.68 ( 43.55 )  |
|           |                  | 15                | -13.72 ( 35.98 )  | 51.81 ( 63.23 )  | 7.47 ( 35.14 )   | 9.71 ( 35.19 )   | 22.63 ( 61.63 )   |
|           |                  | 16                | -5.12 ( 33.72 )   | 5.19 ( 53.48 )   | -24.73 ( 40.99 ) | 14.66 ( 49.27 )  | 24.78 ( 49.95 )   |
|           |                  | 17                | -58.21 ( 30.24 )  | -57.64 ( 48.87 ) | -73.54 ( 38.15 ) | -14.63 ( 28.01 ) | 3.68 ( 44.42 )    |
| 18        | -47.64 ( 27.41 ) | -41.54 ( 34.14 )  | -56.24 ( 49.50 )  | -17.34 ( 27.67 ) | -11.75 ( 38.40 ) |                  |                   |
| Potassium | mEq              | Baseline          | 45.166 ( 11.183 ) | 44.269 ( 8.152 ) | 43.858 ( 7.568 ) | 39.114 ( 9.842 ) | 46.358 ( 14.304 ) |
|           | ΔmEq             | 1                 | 0.184 ( 4.932 )   | 4.280 ( 5.670 )  | 8.803 ( 5.677 )  | 7.024 ( 8.014 )  | 3.252 ( 10.677 )  |
|           |                  | 2                 | -6.299 ( 7.577 )  | -9.470 ( 6.345 ) | -8.501 ( 7.817 ) | -3.925 ( 6.688 ) | -4.742 ( 10.588 ) |
|           |                  | 3                 | -4.876 ( 8.071 )  | -1.698 ( 7.775 ) | 3.202 ( 6.415 )  | 2.824 ( 9.988 )  | -3.382 ( 9.786 )  |
|           |                  | 4                 | -4.996 ( 5.131 )  | -2.239 ( 7.367 ) | 0.826 ( 8.908 )  | 0.540 ( 9.967 )  | -4.088 ( 8.900 )  |
|           |                  | 5                 | -5.164 ( 9.063 )  | -0.195 ( 9.379 ) | 0.073 ( 8.879 )  | 0.399 ( 11.223 ) | -2.984 ( 8.946 )  |
|           |                  | 6                 | -10.268 ( 7.895 ) | -4.752 ( 6.813 ) | -3.349 ( 9.009 ) | 1.974 ( 10.591 ) | -4.630 ( 11.245 ) |
|           |                  | 15                | -2.881 ( 5.140 )  | 0.091 ( 8.423 )  | 5.235 ( 9.534 )  | 2.980 ( 5.726 )  | 1.502 ( 16.191 )  |
|           |                  | 16                | -1.898 ( 6.009 )  | -3.442 ( 5.794 ) | 0.447 ( 8.765 )  | 2.956 ( 8.149 )  | -1.281 ( 11.671 ) |
|           |                  | 17                | 0.089 ( 23.143 )  | -6.107 ( 6.597 ) | -3.235 ( 7.652 ) | -0.424 ( 8.886 ) | -0.044 ( 12.235 ) |
| 18        | -8.784 ( 6.121 ) | -4.960 ( 10.342 ) | -4.985 ( 9.474 )  | 0.662 ( 11.152 ) | -3.035 ( 9.017 ) |                  |                   |

|          |      |          |                    |                    |                    |                    |                    |
|----------|------|----------|--------------------|--------------------|--------------------|--------------------|--------------------|
|          | mEq  | Baseline | 179.61 ( 41.83 )   | 213.12 ( 33.46 )   | 206.75 ( 35.74 )   | 129.88 ( 53.64 )   | 143.46 ( 62.59 )   |
| Chloride | ΔmEq | 1        | -21.73 ( 31.67 )   | 23.73 ( 43.84 )    | 48.72 ( 39.02 )    | 37.99 ( 43.28 )    | 27.09 ( 28.95 )    |
|          |      | 2        | -34.96 ( 27.68 )   | -53.96 ( 26.65 )   | -34.61 ( 55.82 )   | -27.08 ( 31.22 )   | -37.01 ( 31.67 )   |
|          |      | 3        | -33.72 ( 25.81 )   | -11.08 ( 51.78 )   | 19.15 ( 33.18 )    | -0.67 ( 32.98 )    | -11.59 ( 40.37 )   |
|          |      | 4        | -11.93 ( 29.53 )   | -3.31 ( 48.37 )    | 40.02 ( 44.42 )    | -15.39 ( 23.52 )   | -21.75 ( 26.87 )   |
|          |      | 5        | 5.37 ( 45.65 )     | 13.84 ( 51.93 )    | 18.20 ( 48.06 )    | -14.81 ( 26.22 )   | -17.98 ( 30.29 )   |
|          |      | 6        | -34.73 ( 42.91 )   | -37.11 ( 39.17 )   | -29.77 ( 30.96 )   | -4.50 ( 27.60 )    | -28.85 ( 39.58 )   |
|          |      | 15       | -17.38 ( 33.86 )   | 47.64 ( 58.99 )    | 1.33 ( 41.74 )     | 7.19 ( 31.91 )     | 9.08 ( 56.96 )     |
|          |      | 16       | -9.72 ( 33.26 )    | 1.57 ( 48.90 )     | -26.33 ( 36.00 )   | 8.81 ( 40.05 )     | 7.08 ( 46.46 )     |
|          |      | 17       | -50.32 ( 28.83 )   | -59.33 ( 46.62 )   | -70.22 ( 35.52 )   | -20.19 ( 24.59 )   | -8.95 ( 42.09 )    |
|          |      | 18       | -47.94 ( 29.44 )   | -44.32 ( 28.75 )   | -52.69 ( 47.08 )   | -22.13 ( 26.83 )   | -23.54 ( 35.02 )   |
|          | mg   | Baseline | 177.448 ( 59.840 ) | 172.233 ( 62.022 ) | 180.974 ( 66.494 ) | 193.388 ( 81.102 ) | 211.774 ( 84.723 ) |
| Calcium  | Δmg  | 1        | -27.568 ( 19.840 ) | -19.904 ( 30.800 ) | -23.228 ( 31.220 ) | -25.703 ( 21.318 ) | -37.937 ( 20.705 ) |
|          |      | 2        | -25.138 ( 45.104 ) | 1.314 ( 33.852 )   | 18.852 ( 22.630 )  | -33.561 ( 52.259 ) | -34.330 ( 27.035 ) |
|          |      | 3        | -31.154 ( 29.833 ) | -32.993 ( 36.905 ) | -20.230 ( 29.724 ) | -30.089 ( 32.091 ) | -19.099 ( 39.842 ) |
|          |      | 4        | -8.555 ( 42.378 )  | -25.558 ( 25.406 ) | -4.119 ( 25.652 )  | -42.846 ( 42.591 ) | -23.190 ( 46.577 ) |
|          |      | 5        | -10.606 ( 36.917 ) | -14.433 ( 32.250 ) | -17.856 ( 35.647 ) | -30.909 ( 40.119 ) | -27.516 ( 45.014 ) |
|          |      | 6        | -38.308 ( 36.881 ) | -38.393 ( 45.227 ) | -31.101 ( 42.559 ) | -39.952 ( 33.565 ) | -41.196 ( 55.194 ) |
|          |      | 15       | -26.609 ( 33.421 ) | 7.650 ( 38.051 )   | -0.456 ( 30.301 )  | -30.780 ( 44.531 ) | -23.455 ( 61.516 ) |
|          |      | 16       | -9.507 ( 33.654 )  | 20.658 ( 37.618 )  | 3.545 ( 33.798 )   | -23.658 ( 58.913 ) | -19.859 ( 61.746 ) |
|          |      | 17       | -19.456 ( 51.302 ) | -7.710 ( 38.305 )  | -12.658 ( 26.920 ) | -29.660 ( 51.224 ) | 2.854 ( 58.871 )   |
|          |      | 18       | -27.027 ( 41.766 ) | 6.297 ( 34.398 )   | 4.339 ( 29.907 )   | -28.527 ( 45.683 ) | -11.148 ( 61.059 ) |

|                      |     |          |                     |                      |                      |                     |                     |
|----------------------|-----|----------|---------------------|----------------------|----------------------|---------------------|---------------------|
|                      | mg  | Baseline | 84.356 ( 27.730 )   | 81.991 ( 19.341 )    | 77.048 ( 11.855 )    | 91.272 ( 27.163 )   | 98.086 ( 30.709 )   |
| Magnesium            | Δmg | 1        | -2.158 ( 18.353 )   | -9.784 ( 10.310 )    | -18.296 ( 10.623 )   | -30.156 ( 14.467 )  | -37.695 ( 14.381 )  |
|                      |     | 2        | -2.391 ( 18.674 )   | 9.743 ( 12.615 )     | 19.913 ( 12.675 )    | -10.733 ( 19.418 )  | -13.078 ( 14.49 )   |
|                      |     | 3        | -4.322 ( 15.727 )   | -11.896 ( 9.636 )    | -0.671 ( 8.288 )     | -13.665 ( 17.396 )  | -10.454 ( 15.265 )  |
|                      |     | 4        | 1.713 ( 20.302 )    | -6.528 ( 9.803 )     | 13.23 ( 13.520 )     | -11.811 ( 16.562 )  | -3.360 ( 20.758 )   |
|                      |     | 5        | 0.192 ( 23.288 )    | 8.502 ( 25.203 )     | 14.506 ( 13.088 )    | -6.768 ( 12.305 )   | -6.594 ( 14.842 )   |
|                      |     | 6        | -9.264 ( 21.995 )   | -5.669 ( 13.310 )    | 10.701 ( 9.982 )     | -7.106 ( 11.519 )   | -9.936 ( 18.606 )   |
|                      |     | 15       | -3.030 ( 19.106 )   | 9.288 ( 19.043 )     | 8.819 ( 17.892 )     | 5.281 ( 18.571 )    | 11.073 ( 25.534 )   |
|                      |     | 16       | 7.681 ( 15.558 )    | 16.155 ( 14.294 )    | 16.451 ( 11.703 )    | 6.774 ( 22.162 )    | 8.121 ( 26.287 )    |
|                      |     | 17       | 8.723 ( 15.556 )    | 19.404 ( 16.575 )    | 26.605 ( 13.310 )    | 4.573 ( 23.484 )    | 25.705 ( 27.212 )   |
|                      |     | 18       | -3.396 ( 18.594 )   | 28.343 ( 18.442 )    | 33.876 ( 14.254 )    | 2.183 ( 16.959 )    | 10.906 ( 16.874 )   |
|                      | mg  | Baseline | 667.442 ( 146.987 ) | 762.557 ( 127.104 )  | 825.593 ( 127.634 )  | 654.491 ( 119.384 ) | 677.438 ( 123.725 ) |
| Inorganic phosphorus | Δmg | 1        | 9.435 ( 122.097 )   | -228.096 ( 113.863 ) | -240.501 ( 96.574 )  | -101.994 ( 126.41 ) | -154.463 ( 95.128 ) |
|                      |     | 2        | -38.305 ( 89.406 )  | 48.013 ( 91.207 )    | 50.997 ( 91.301 )    | 108.788 ( 94.566 )  | 161.924 ( 120.722 ) |
|                      |     | 3        | -16.189 ( 161.166 ) | -140.364 ( 125.632 ) | -122.946 ( 120.974 ) | 102.604 ( 140.808 ) | 201.906 ( 145.555 ) |
|                      |     | 4        | 63.842 ( 158.104 )  | 1.254 ( 92.293 )     | 76.452 ( 108.489 )   | 55.614 ( 95.226 )   | 170.215 ( 113.188 ) |
|                      |     | 5        | 11.965 ( 151.733 )  | -36.354 ( 111.248 )  | -8.516 ( 91.331 )    | 74.690 ( 145.196 )  | 166.743 ( 123.038 ) |
|                      |     | 6        | -40.174 ( 123.480 ) | 13.853 ( 143.580 )   | 18.594 ( 94.351 )    | 58.687 ( 77.332 )   | 139.720 ( 140.589 ) |
|                      |     | 15       | -48.286 ( 110.391 ) | 0.128 ( 116.229 )    | 30.316 ( 102.054 )   | 18.084 ( 89.494 )   | 47.340 ( 157.115 )  |
|                      |     | 16       | 10.541 ( 138.422 )  | -53.40 ( 91.442 )    | -58.157 ( 122.926 )  | 38.156 ( 148.240 )  | 36.073 ( 200.775 )  |
|                      |     | 17       | -3.728 ( 111.781 )  | 52.488 ( 104.319 )   | 5.795 ( 79.034 )     | 49.905 ( 127.263 )  | 92.078 ( 113.624 )  |
|                      |     | 18       | -87.282 ( 128.705 ) | -90.183 ( 96.711 )   | -42.588 ( 88.040 )   | 57.935 ( 129.751 )  | 116.452 ( 157.906 ) |

*SD* standard deviation
